# Supplementary material
Source: HighWire-hosted journal article supplement (https://www.cmajopen.ca/highwire/filestream/81334/field_highwire_adjunct_files/1/2019-0037-2-at.pdf)
Supplement: 2019-0037-2-at.pdf [file 2019-0037-2-at.pdf]

## Appendix 2 (as supplied by the authors): Rates of missing data by question

| Variable                                                                             | Number (Percentage) |
|--------------------------------------------------------------------------------------|---------------------|
| Age                                                                                  | 3 (0.70%)           |
| Gender                                                                               | 0 (0.00%)           |
| Health Care Professional                                                             | 0 (0.00%)           |
| Province                                                                             | 6 (1.40%)           |
| Education                                                                            | 2 (0.47%)           |
| Previously acted as an SDM                                                           | 3 (0.70%)           |
| Previously participated in ACP for self                                              | 4 (0.93%)           |
| Self-reported preparedness                                                           | 10 (2.33%)          |
| Belief that will have to act as SDM                                                  | 11 (2.56%)          |
| Previously had conversations with loved one about values in critical illness         | 13 (3.02%)          |
| Comfortable initiating conversations with loved one about values in critical illness | 13 (3.02%)          |
| Belief that conversations are a learnable skill                                      | 13 (3.02%)          |
| Belief that 16-year-olds can be taught about SDMs                                    | 15 (3.49%)          |
| Belief that 16-year-olds should be taught about SDMs                                 | 15 (3.49%)          |
